# Supplementary material
Source: publisher figshare collection journal article supplement (https://tandf.figshare.com/ndownloader/files/22331556)
Supplement: Supplementary file 1 [file 22331556]

| **Supplemental File 1.** Analyses in sensitivity, specificity, positive and negative predictive values of severe thrombocytopenia (platelet count < 50 × 109/L) for acute kidney injury | | | | | | | |
| --- | --- | --- | --- | --- | --- | --- | --- |
| **Whole study population (n=591)** | | | | | | | |
| Sensitivity (%) | 95% CI | Specificity (%) | 95% CI | Positive PV (%) | 95% CI | Negative PV (%) | 95% CI |
| 43.62 | 35.5 – 52.0 | 71.27 | 66.8 – 75.4 | 33.9 | 27.2 – 41.0 | 78.9 | 74.6 – 82.8 |
| **PS-matched patients (n=380)** | | | | | | | |
| Sensitivity (%) | 95% CI | Specificity (%) | 95% CI | Positive PV (%) | 95% CI | Negative PV (%) | 95% CI |
| 58.04 | 48.3 – 67.3 | 53.36 | 47.2 – 59.5 | 34.2 | 27.5 – 41.4 | 75.3 | 68.5 – 81.2 |
| **Abbreviations:** CI, confidence interval; PV, predictive value; PS, propensity score | | | | | | | |
